# Supplementary material for: Differentiated tumor immune microenvironment of Epstein–Barr virus-associated and negative gastric cancer: implication in prognosis and immunotherapy
Source: PubMed Central journal article supplement (PMC5620158; doi:10.18632/oncotarget.17945), 2017-05-16
Supplement: oncotarget-08-67094-s002.pdf [file oncotarget-08-67094-s002.pdf]

**Supplementary Table 1. Clinicopathological characteristics of the patient populations**

|           | Complete cohort (n=571) |      | EBV status         |      |                 |      | p                  |
|-----------|-------------------------|------|--------------------|------|-----------------|------|--------------------|
|           |                         |      | Negative ( n=540 ) |      | Positive (n=31) |      |                    |
|           | N                       | %    | N                  | %    | N               | %    |                    |
| Gender    |                         |      |                    |      |                 |      | 0.111 <sup>#</sup> |
| Male      | 407                     | 71.3 | 381                | 70.6 | 26              | 83.9 |                    |
| Female    | 164                     | 28.7 | 159                | 29.4 | 5               | 16.1 |                    |
| Age, year | 571                     |      | 540                |      | 31              |      | 0.049 <sup>S</sup> |
| Median    | 59                      |      | 59                 |      | 54              |      |                    |
| T stage   |                         |      |                    |      |                 |      | 0.912 <sup>#</sup> |
| 1a        | 6                       | 1.1  | 6                  | 1.1  | 0               | 0    |                    |
| 1b        | 12                      | 2.2  | 11                 | 2.1  | 1               | 3.4  |                    |
| 2         | 67                      | 11.6 | 65                 | 12.4 | 2               | 6.9  |                    |
| 3         | 238                     | 42.2 | 224                | 42.7 | 14              | 48.3 |                    |
| 4a        | 207                     | 37.4 | 196                | 37.3 | 11              | 37.9 |                    |
| 4b        | 24                      | 4.3  | 23                 | 4.4  | 1               | 3.4  |                    |
| N stage   |                         |      |                    |      |                 |      | 0.091 <sup>#</sup> |
| N0        | 112                     | 20.4 | 107                | 20.6 | 5               | 17.2 |                    |
| N1        | 102                     | 18.6 | 92                 | 17.7 | 10              | 34.5 |                    |
| N2        | 137                     | 25   | 132                | 25.4 | 5               | 17.2 |                    |
| N3a       | 122                     | 22.2 | 119                | 22.9 | 3               | 10.3 |                    |
| N3b       | 76                      | 13.8 | 70                 | 13.5 | 6               | 20.7 |                    |
| M stage   |                         |      |                    |      |                 |      | 0.220 <sup>#</sup> |
| M0        | 518                     | 94.4 | 492                | 94.6 | 26              | 89.7 |                    |
| M1        | 31                      | 5.6  | 28                 | 5.4  | 3               | 10.3 |                    |

| AJCC                |     |      |     |      |    |      |                    |
|---------------------|-----|------|-----|------|----|------|--------------------|
| Ia                  | 14  | 2.6  | 13  | 2.5  | 1  | 3.4  | 0.370 <sup>#</sup> |
| Ib                  | 32  | 5.8  | 32  | 6.1  | 0  | 0    |                    |
| IIa                 | 54  | 9.8  | 49  | 9.4  | 5  | 17.2 |                    |
| IIb                 | 93  | 16.9 | 86  | 16.5 | 7  | 24.1 |                    |
| IIIa                | 98  | 17.9 | 94  | 18.1 | 4  | 13.8 |                    |
| IIIb                | 138 | 25.1 | 134 | 25.8 | 4  | 13.8 |                    |
| IIIc                | 89  | 16.2 | 84  | 16.2 | 5  | 17.2 |                    |
| IV                  | 31  | 5.6  | 28  | 5.4  | 3  | 10.3 |                    |
| Tumor location      |     |      |     |      |    |      | 0.181 <sup>#</sup> |
| Upper 1/3           | 184 | 34.8 | 172 | 34.4 | 12 | 41.4 |                    |
| Middle 1/3          | 84  | 15.9 | 78  | 15.6 | 6  | 20.7 |                    |
| Low 1/3             | 211 | 39.9 | 205 | 41   | 6  | 20.7 |                    |
| Upper 2/3 and whole | 47  | 8.9  | 42  | 8.4  | 5  | 17.2 |                    |
| Remnant             | 3   | 0.6  | 3   | 0.6  | 0  | 0    |                    |
| Histology           |     |      |     |      |    |      | 0.493 <sup>#</sup> |
| Adenocarcinoma      | 526 | 92.6 | 498 | 92.7 | 28 | 90.3 |                    |
| Other types         | 42  | 7.4  | 39  | 7.3  | 3  | 9.7  |                    |
| Differentiation     |     |      |     |      |    |      | 0.324 <sup>#</sup> |
| High                | 109 | 56.7 | 106 | 19.5 | 3  | 9.5  |                    |
| Moderate            | 138 | 24.2 | 131 | 24.3 | 7  | 22.8 |                    |
| Low                 | 324 | 56.7 | 303 | 56.2 | 21 | 66.7 |                    |

Abbreviations: EBV, Epstein-Barr virus; T, tumor; N, node; M, metastasis; N, number.

<sup>#</sup>Pearson  $\chi^2$  or Fisher's exact test.

<sup>\$</sup>Mann-Whitney U test.
