# Supplementary material for: Differentiated tumor immune microenvironment of Epstein–Barr virus-associated and negative gastric cancer: implication in prognosis and immunotherapy
Source: PubMed Central journal article supplement (PMC5620158; doi:10.18632/oncotarget.17945), 2017-05-16
Supplement: oncotarget-08-67094-s003.pdf [file oncotarget-08-67094-s003.pdf]

**Supplementary Table 2. Clinicopathological characteristics of patients by different markers**

|            | CD4 <sup>+</sup> cell |                       | CD8 <sup>+</sup> cell |                       | Foxp3 <sup>+</sup> cell |                       | PD-1              |                   | PD-L1             |                   |
|------------|-----------------------|-----------------------|-----------------------|-----------------------|-------------------------|-----------------------|-------------------|-------------------|-------------------|-------------------|
|            | Absent<br>N (%)       | Infiltration<br>N (%) | Absent<br>N (%)       | Infiltration<br>N (%) | Absent<br>N (%)         | Infiltration<br>N (%) | Positive<br>N (%) | Negative<br>N (%) | Positive<br>N (%) | Negative<br>N (%) |
| Gender     | 304                   | 263                   | 404                   | 167                   | 337                     | 222                   | 234               | 337               | 170               | 352               |
| Male       | 225 (74.0)            | 180 (68.4)            | 289 (71.5)            | 118 (70.7)            | 237 (70.3)              | 162 (73.0)            | 170 (72.6)        | 237 (70.3)        | 119 (70.0)        | 251 (71.0)        |
| Female     | 79 (26.0)             | 83 (31.6)             | 115 (28.5)            | 49 (29.3)             | 100 (29.7)              | 60 (27.0)             | 64 (27.4)         | 100 (29.7)        | 51 (30.0)         | 101 (28.5)        |
| Age (year) | 304                   | 263                   | 404                   | 167                   | 337                     | 222                   | 234               | 337               | 170               | 352               |
| Median     | 29-86 (59)            | 21-87 (58)            | 28-82 (58)            | 21-87 (58)            | 28-87 (58)              | 21-86 (59)            | 21-87 (59)        | 28-87 (58)        | 26-87 (58)        | 21-86 (58)        |
| AJCC       | 286                   | 262                   | 387                   | 165                   | 330                     | 210                   | 223               | 329               | 165               | 338               |
| Ia         | 4 (1.4)               | 10 (3.8)              | 8 (2.1)               | 6 (3.6)               | 4 (1.2)                 | 9 (4.3)               | 4 (1.8)           | 10 (3.0)          | 4 (2.4)           | 8 (2.4)           |
| Ib         | 12 (4.2)              | 20 (7.6)              | 15 (3.9)              | 17 (10.3)             | 10 (3.0)                | 22 (10.5)             | 13 (5.8)          | 19 (5.8)          | 15 (9.1)          | 14 (4.1)          |
| IIa        | 19 (6.6)              | 34 (13.0)             | 38 (9.8)              | 17 (10.3)             | 24 (7.3)                | 30 (14.3)             | 18 (8.1)          | 37 (11.2)         | 13 (7.9)          | 33 (9.8)          |
| IIb        | 44 (15.4)             | 50 (19.1)             | 64 (16.5)             | 31 (18.8)             | 55 (16.7)               | 38 (18.1)             | 34 (15.2)         | 61 (18.5)         | 27 (16.4)         | 61 (18.0)         |
| IIIa       | 52 (18.2)             | 45 (17.2)             | 64 (16.5)             | 34 (20.6)             | 61 (18.5)               | 35 (16.7)             | 45 (20.2)         | 53 (16.1)         | 21 (12.7)         | 71 (21.0)         |
| IIIb       | 80 (26.3)             | 58 (22.1)             | 110 (28.4)            | 28 (17.0)             | 91 (27.6)               | 46 (21.9)             | 55 (14.7)         | 83 (25.2)         | 47 (28.5)         | 79 (23.4)         |
| IIIc       | 56 (19.6)             | 33 (12.6)             | 62 (16.0)             | 27 (16.4)             | 60 (17.8)               | 26 (12.4)             | 44 (19.7)         | 45 (13.7)         | 32 (19.4)         | 51 (15.1)         |
| IV         | 19 (6.6)              | 12 (4.6)              | 26 (6.7)              | 5 (3.0)               | 25 (7.6)                | 4 (1.9)               | 10 (4.5)          | 21 (6.4)          | 6 (3.6)           | 21 (6.2)          |

|                            |            |            |            |           |            |            |            |            |           |            |
|----------------------------|------------|------------|------------|-----------|------------|------------|------------|------------|-----------|------------|
| Location                   | 270        | 255        | 371        | 158       | 314        | 204        | 216        | 313        | 158       | 323        |
| Upper 1/3                  | 80 (29.6)  | 102 (40.0) | 121 (32.6) | 63 (39.9) | 113 (36.0) | 68 (33.3)  | 68 (31.5)  | 116 (37.1) | 57 (36.1) | 114 (35.3) |
| Middle 1/3                 | 37 (13.7)  | 46 (18.0)  | 62 (16.7)  | 22 (13.9) | 44 (14.0)  | 39 (19.1)  | 47 (21.8)  | 37 (11.8)  | 27 (17.1) | 41 (12.7)  |
| Lower 1/3                  | 122 (45.2) | 88 (34.5)  | 152 (41.0) | 59 (37.3) | 120 (38.2) | 85 (41.7)  | 85 (39.4)  | 126 (40.3) | 61 (38.6) | 134 (41.0) |
| Upper 1/3 and whole        | 29 (10.8)  | 18 (7.1)   | 33 (8.9)   | 14 (8.9)  | 34 (10.8)  | 12 (5.9)   | 14 (6.5)   | 33 (10.6)  | 13 (8.3)  | 31 (9.6)   |
| Remnant                    | 2 (0.7)    | 1 (0.4)    | 3 (0.8)    | 0         | 3 (1.0)    | 0          | 2 (0.9)    | 1 (0.3)    | 0         | 3 (0.9)    |
| Depth                      | 301        | 261        | 401        | 165       | 335        | 219        | 233        | 333        | 168       | 349        |
| Mucosa                     | 1 (0.3)    | 2 (0.8)    | 1 (0.2)    | 2 (1.2)   | 1 (0.3)    | 2 (0.9)    | 0          | 3 (0.9)    | 1 (0.6)   | 2 (0.6)    |
| Laminae muscularis mucosae | 0          | 1 (0.4)    | 0          | 1 (0.6)   | 1 (0.3)    | 0          | 0          | 1 (0.3)    | 1 (0.6)   | 0          |
| Submucosa                  | 4 (1.3)    | 11 (4.2)   | 11 (2.7)   | 4 (2.4)   | 6 (1.8)    | 8 (3.7)    | 5 (2.1)    | 10 (3.0)   | 5 (3.0)   | 7 (2.0)    |
| Muscular                   | 23 (7.6)   | 39 (14.9)  | 40 (10.0)  | 23 (13.9) | 23 (6.9)   | 38 (17.4)  | 28 (12.0)  | 35 (10.5)  | 23 (13.7) | 36 (10.6)  |
| Serosa                     | 151 (50.2) | 142 (54.4) | 215 (53.6) | 79 (47.9) | 171 (51.0) | 122 (55.7) | 129 (55.4) | 165 (49.5) | 78 (46.4) | 183 (52.4) |
| Subserosa                  | 122 (40.5) | 66 (25.3)  | 134 (33.4) | 56 (33.9) | 133 (39.7) | 49 (22.4)  | 71 (30.5)  | 119 (35.7) | 60 (35.7) | 121 (34.7) |

Abbreviations: CD4, cluster of differentiation 4; CD8, cluster of differentiation 8; Foxp3, Forkhead box P3; PD-1, programmed death 1; PD-L1, programmed death ligand-1; N, number; AJCC, American Joint Committee on Cancer
