# Supplementary material for: Differentiated tumor immune microenvironment of Epstein–Barr virus-associated and negative gastric cancer: implication in prognosis and immunotherapy
Source: Oncotarget. 2017 May 16;8(40):67094–103. doi: 10.18632/oncotarget.17945 (PMC5620158; doi:10.18632/oncotarget.17945)
Supplement: Supplementary file 1 [file oncotarget-08-67094-s001.pdf]

## Differentiated tumor immune microenvironment of Epstein-Barr virus-associated and negative gastric cancer: implication in prognosis and immunotherapy

### SUPPLEMENTARY MATERIALS

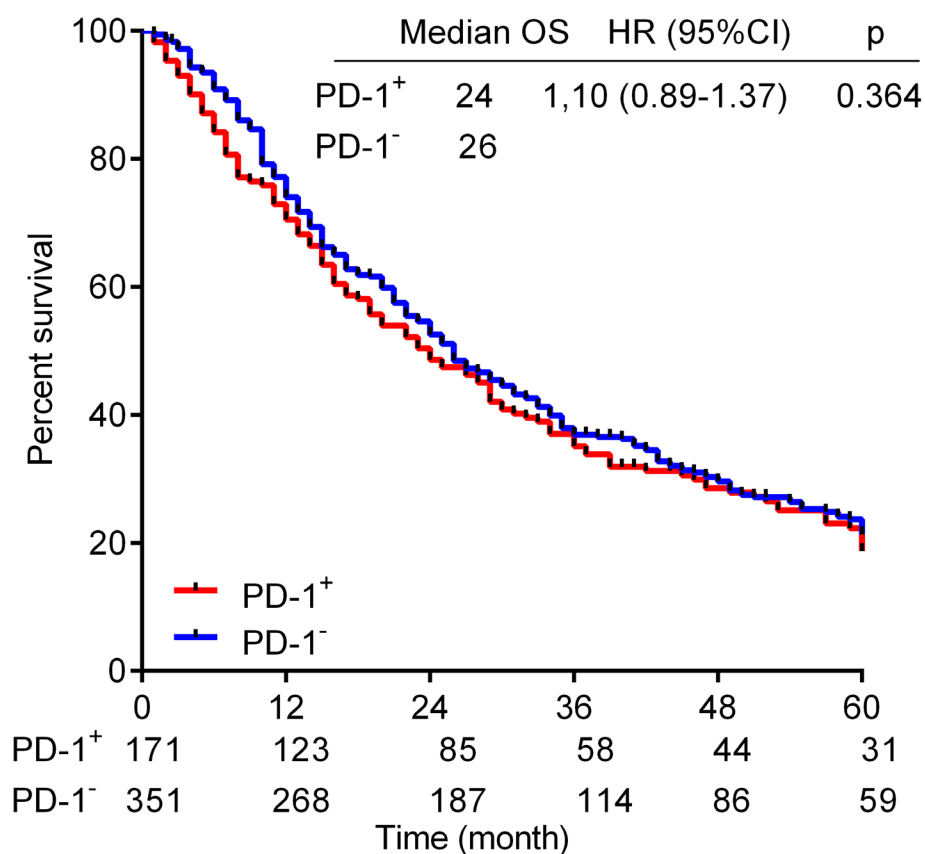

**Supplementary Figure 1: Kaplan-Meier method log-rank testing for 5-year overall survival (OS) by Programmed death 1 (PD-1) expression in gastric cancer.** PD-1 expression had no correlation with 5-year OS in complete cohort. ([HR] was 1.10, 95% confidence interval was 0.89 to 1.37,  $p=0.364$ ).

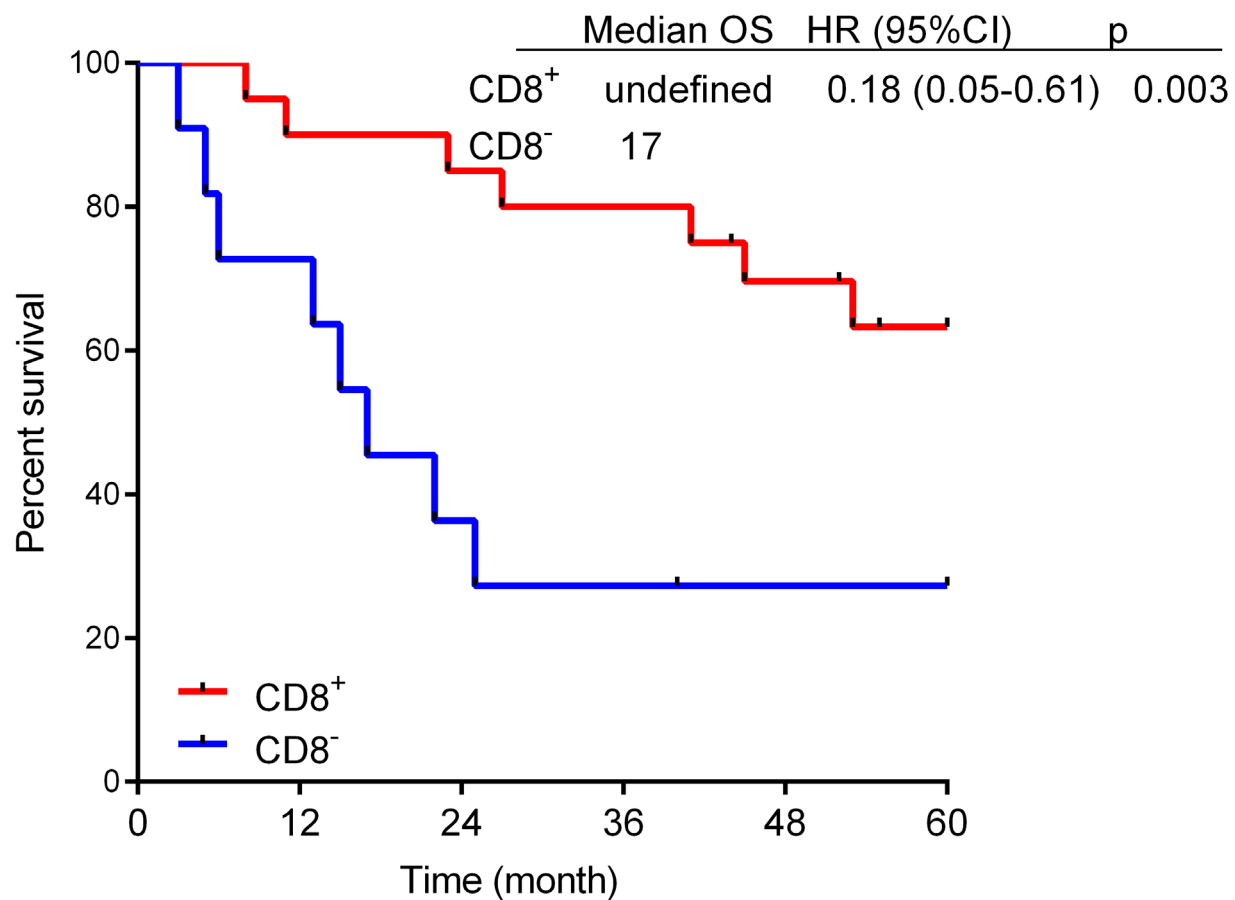

Supplementary Figure 2: Kaplan-Meier method log-rank testing for 5-year overall survival by CD8<sup>+</sup> cell infiltration in Epstein-Barr virus-associated gastric cancer.

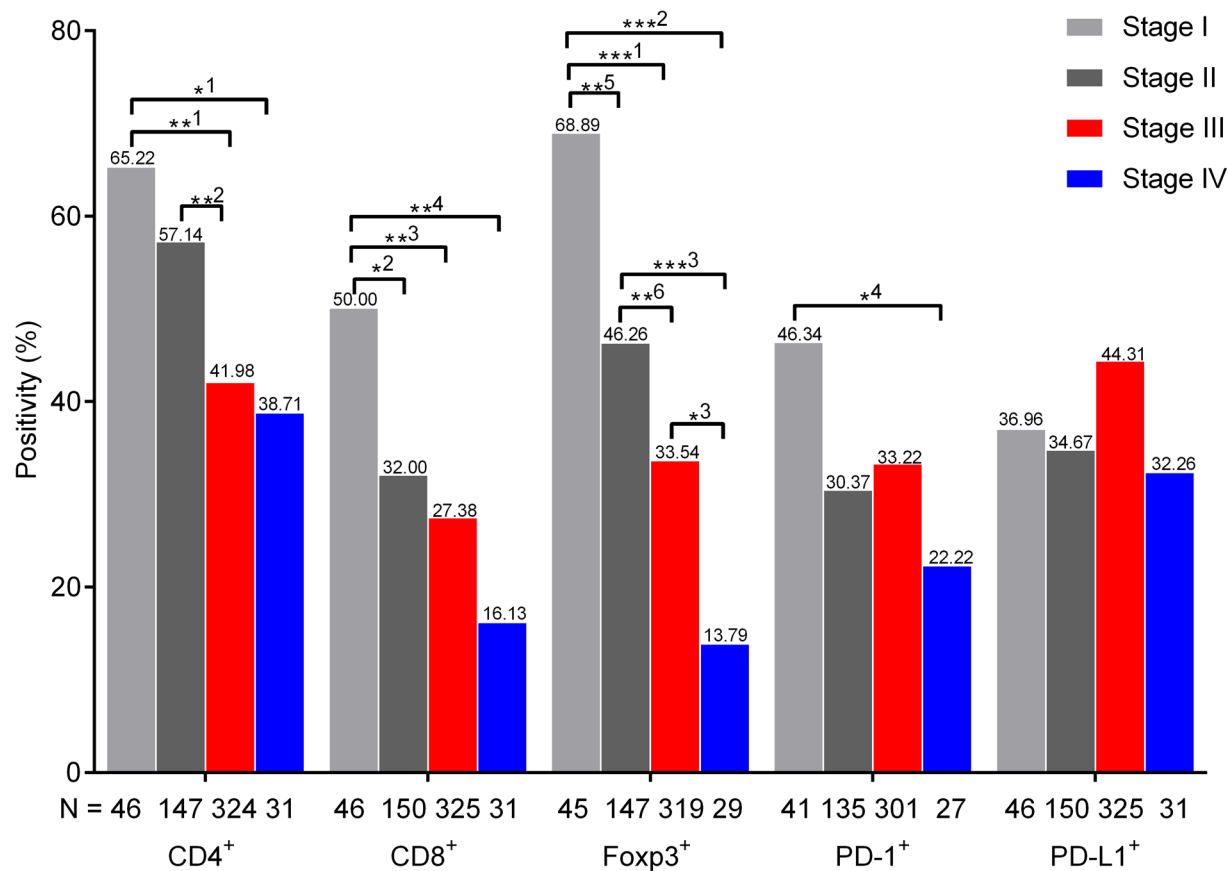

**Supplementary Figure 3: The percentage of CD4<sup>+</sup>, CD8<sup>+</sup>, Foxp3<sup>+</sup> cell infiltration and PD-1 and PD-L1 expression in different AJCC stages of gastric cancer.** The number of patients in each subgroup was under X-axis and the positivity in different AJCC stages was labelled above each bar.

\*<sup>1</sup>p=0.022, \*<sup>2</sup>p=0.026, \*<sup>3</sup>p=0.029, \*<sup>4</sup>p=0.044;

\*\*<sup>1</sup>p=0.003, \*\*<sup>2</sup>p=0.002, \*\*<sup>3</sup>p=0.002, \*\*<sup>4</sup>p=0.002, \*\*<sup>5</sup>p=0.008, \*\*<sup>6</sup>p=0.008;

\*\*\*<sup>1</sup>p<0.001, \*\*\*<sup>2</sup>p<0.001, \*\*\*<sup>3</sup>p=0.001.

Bonferroni correction for multiple comparisons was applied, two side.

CD4, cluster of differentiation 4; CD8, cluster of differentiation 8; Foxp3, Forkhead box P3; PD-1, programmed death 1; PD-L1, programmed death ligand-1;

AJCC, American Joint Committee on Cancer

**Supplementary Table 1: Clinicopathological characteristics of the patient populations**

See Supplementary File 1

**Supplementary Table 2: Clinicopathological characteristics of patients by different markers**

See Supplementary File 2
